# Supplementary material
Source: PubMed Central journal article supplement (PMC3042873)

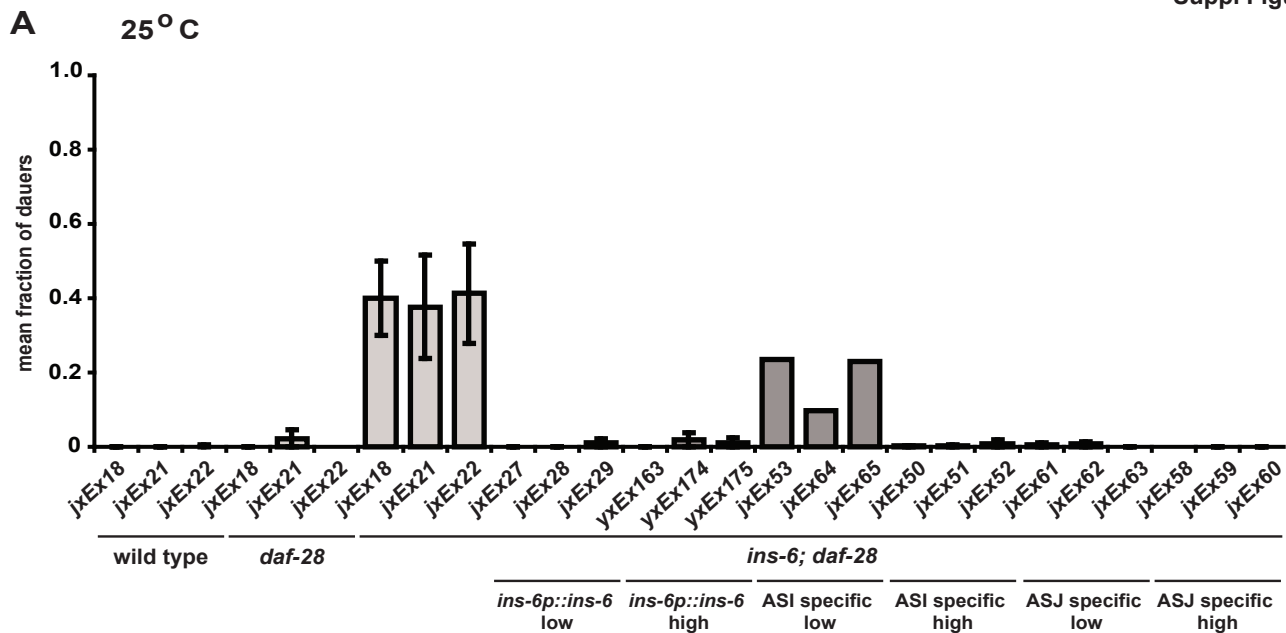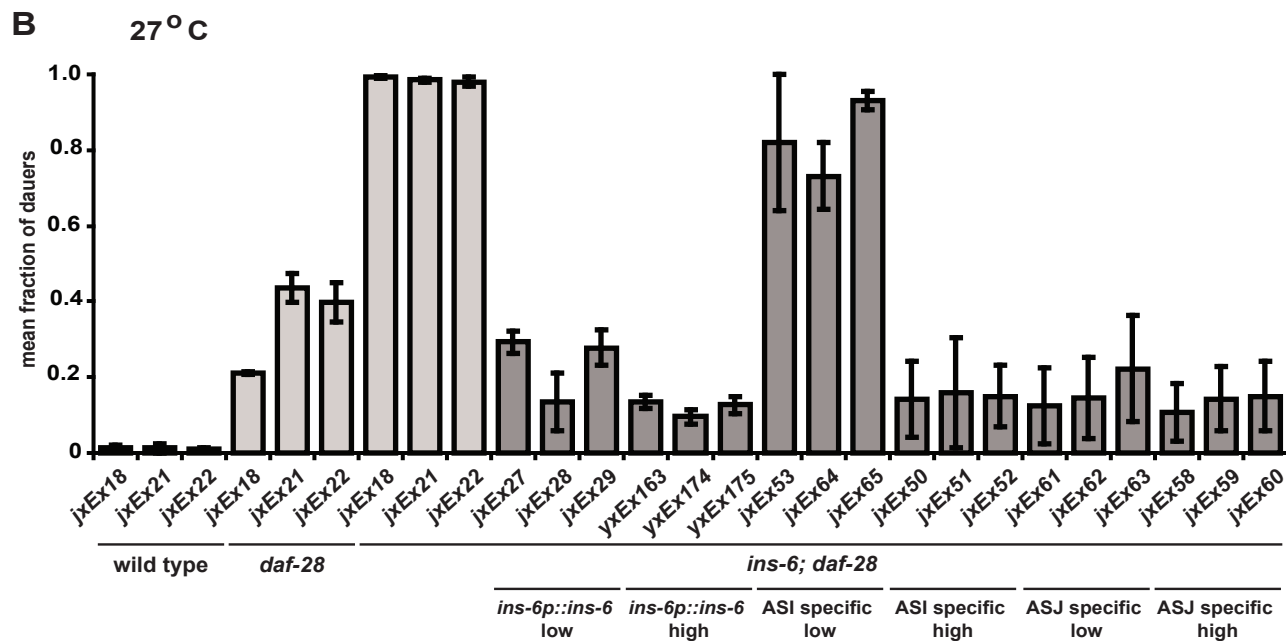

Supplement: supp_138.6.1183_DEV060905FigS1.pdf [file supp_138.6.1183_DEV060905FigS1.pdf]
